# Supplementary material
Source: PubMed Central journal article supplement (PMC3360570)
Supplement: supp_185.8.835_Iwashyna_ODS.pdf [file supp_185.8.835_Iwashyna_ODS.pdf]

**Spurious Inferences about Long-term Outcomes: The Case of Severe Sepsis and Geriatric Conditions**

Theodore J. Iwashyna  
Giora Netzer  
Kenneth M. Langa  
Christine Cigolle

**ONLINE DATA SUPPLEMENT**

**Electronic Table 1: Comparison of the Survivors Cohort to U.S. Population**

**Prevalence of Geriatric Conditions among those Aged 65 and Above.** General population data were assessed using the same instrument, previously published.<sup>20</sup> Data from a cohort that included only the first hospitalization for severe sepsis in the HRS is provided as the last column for comparison to **Table 2**.

|                | General Population       | After Severe Sepsis                     |                                                          |
|----------------|--------------------------|-----------------------------------------|----------------------------------------------------------|
|                | Aged 65+                 |                                         |                                                          |
|                | Proportion <sup>20</sup> | Proportion (95% CI)<br>In Entire Cohort | Proportion in<br>Only First<br>Hospitalization<br>Cohort |
| Incontinence   | 0.13                     | 0.24 (0.21,0.27)                        | 0.24 (0.20,0.27)                                         |
| Low BMI        | 0.03                     | 0.07 (0.05,0.09)                        | 0.06 (0.04, 0.08)                                        |
| Poor Hearing   | 0.26                     | 0.15 (0.12,0.18)                        | 0.14 (0.11,0.17)                                         |
| Poor Vision    | 0.08                     | 0.20 (0.17,0.23)                        | 0.19 (0.15,0.22)                                         |
| Severe Pain    | Not reported             | 0.12 (0.10,0.15)                        | 0.12 (0.09,0.15)                                         |
| Injurious Fall | 0.10                     | 0.32 (0.28,0.36)                        | 0.32(0.29,0.37)                                          |

**Electronic Table 2: Association of Severe Sepsis with Prevalence of Geriatric Conditions when Full Longitudinal Data are Considered.** Within-person fixed effect (aka, “latent growth curve”) regressions, also controlling for pre-sepsis trajectory. The “Effect of Severe Sepsis In Entire Cohort” column is reproduced from **Table 4**. The other column reports the results of precisely the same analysis in a cohort that included only the first hospitalization for severe sepsis in the HRS and is provided for comparison.

|              | Effect of Severe Sepsis<br>In Entire Cohort |              | Effect of Severe Sepsis<br>In Only First Hospitalization<br>Cohort |         |
|--------------|---------------------------------------------|--------------|--------------------------------------------------------------------|---------|
|              | Odds Ratio<br>Versus Pre-<br>Sepsis         | p-value      | Odds Ratio<br>Versus Pre-<br>Sepsis                                | p-value |
| Incontinence | 1.02<br>(0.61,1.71)                         | 0.939        | 1.23<br>(0.71,2.14)                                                | 0.463   |
| Low BMI      | 5.60<br>(1.86,16.9)                         | <b>0.002</b> | 3.08<br>(0.89,10.67)                                               | 0.076   |
| Poor Hearing | 1.32<br>(0.68,2.57)                         | 0.414        | 1.36<br>(0.72,2.54)                                                | 0.342   |
| Poor Vision  | 1.16<br>(0.69,1.94)                         | 0.571        | 1.30<br>(0.72,2.33)                                                | 0.382   |
| Severe Pain  | 0.70<br>(0.40,1.23)                         | 0.217        | 0.73<br>(0.41,1.31)                                                | 0.292   |

|      |                     |       |                     |       |
|------|---------------------|-------|---------------------|-------|
| Fall | 0.89<br>(0.58,1.38) | 0.610 | 0.84<br>(0.55,1.30) | 0.436 |
|------|---------------------|-------|---------------------|-------|
